# Supplementary material for: Prevalence and associated factors of chorioamnionitis among women with preterm premature rupture of membranes at Mbarara Regional Referral Hospital, Southwestern Uganda
Source: Research Square preprint supplement (doi:10.21203/rs.3.rs-8243152/v1), 2025-12-30
Supplement: Supplementary file 1 [file ca876971df1ffeab74913de4.pdf]

### Appendix 3: Data collection tool (English version)

#### DATA COLLECTION TOOL

**Study title: Prevalence and factors associated with chorioamnionitis among women with P-PROM at mbarara regional referral hospital.**

#### Instructions to the interviewer

- Circle the code(s) of the response(s) given by a respondent from the options provided where necessary.
- Other responses should be written in the spaces/boxes provided.

|                          |
|--------------------------|
| <b>IDENTIFICATION</b>    |
| PARTICIPANT ID NO: _____ |

|                                          |                                          |
|------------------------------------------|------------------------------------------|
| Researcher<br>Name: _____<br>Date: _____ | Data clerk<br>Name: _____<br>Date: _____ |
|------------------------------------------|------------------------------------------|

| No. | Questions                                                                             | Coding Categories                                                              |
|-----|---------------------------------------------------------------------------------------|--------------------------------------------------------------------------------|
| 01  | How old are you?                                                                      | Age in completed years.....                                                    |
| 02  | What is your tribe                                                                    | .....                                                                          |
| 03  | What is your nationality                                                              | .....                                                                          |
| 04  | Where do you reside?                                                                  | Urban area.....0<br>Rural area.....1                                           |
| 05  | Have you ever attended school?<br><b>(IF THE RESPONSE CODE GIVEN IS 0 SKIP TO 05)</b> | No..... 0<br>Yes..... 1                                                        |
| 06  | What is the highest level of school you attended?                                     | Primary ..... 0<br>Secondary ..... 1<br>Tertiary ..... 2<br>University ..... 3 |

|    |                                                                                                                                                                |                                                                                                                                                                                                                                                                         |
|----|----------------------------------------------------------------------------------------------------------------------------------------------------------------|-------------------------------------------------------------------------------------------------------------------------------------------------------------------------------------------------------------------------------------------------------------------------|
| 07 | What is your marital status                                                                                                                                    | Single .....0<br>Married/Living with a partner.....1<br>Divorced/separated/died.....2                                                                                                                                                                                   |
| 08 | What is your weight in kilogram                                                                                                                                | .....                                                                                                                                                                                                                                                                   |
| 09 | What is your height                                                                                                                                            | .....                                                                                                                                                                                                                                                                   |
| 10 | How much money does the household earn in a month<br>Ask if she or the family has any income generating activity.<br>Does the family live from hands to mouth. | < 100,000/=<br><br>100,000/=-200,000/=<br><br>300,000/=-500,000/=<br><br>500,000/=-1000, 000/=<br><br>> 1000, 000/=<br><br>Does not know/ prefer not to disclose<br><br>Or if they have any income generating activity .....yes.....<br><br>NO.....<br><br>Name it..... |
| 07 | Have you ever smoked cigarette or chewed tobacco                                                                                                               | No.....0<br>Yes.....1                                                                                                                                                                                                                                                   |
|    | If you have ever are you currently smoking/ chewing tobacco.                                                                                                   | .....                                                                                                                                                                                                                                                                   |
|    | Do you take alcohol.<br>Did you consume during this pregnancy                                                                                                  | Yes.....<br>No.....                                                                                                                                                                                                                                                     |

|    |                                                              |                                                                                                    |
|----|--------------------------------------------------------------|----------------------------------------------------------------------------------------------------|
| 08 | What is your religious affiliation                           | catholic.....0<br>protestant.....1<br>moslem.....2<br>others..... 3                                |
| 09 | What is your occupation?                                     | Peasant.....0<br>House wife.....1<br>Professional.....2<br>Business.....3<br>Others (specify)..... |
| 11 | HIV status (Either patient knows, or indicated in the file)  |                                                                                                    |
|    | <b>OBSTETRIC AND GYN HISTORY</b>                             |                                                                                                    |
| 12 | How many times have you become pregnant                      | .....                                                                                              |
| 13 | How many pregnancies have you delivered at or after 26 weeks | .....                                                                                              |
| 14 | Last normal menstrual period                                 | .....                                                                                              |
| 15 | Expected date of delivery                                    | .....                                                                                              |
| 16 | Gestational age                                              |                                                                                                    |

|    |                                                    |                         |
|----|----------------------------------------------------|-------------------------|
| 17 | Did you attend ANC during this pregnancy           |                         |
| 18 | Number of ANC visits attended and the first visit  |                         |
| 19 | Documentation of pre-pregnancy weight              |                         |
| 20 | When did you start draining liquor                 |                         |
| 21 | Has she drained liquor in her previous pregnancies |                         |
| 22 | For how long have you been draining liquor         | Days.....<br>Hours..... |
| 23 | Does the liquor have bad smell                     |                         |
| 24 | Do you get a lower abdominal pain                  |                         |
| 25 | Do you have a fever                                |                         |
| 26 | What treatment where you given                     |                         |

|    |                                                                                   |                                                                                                                                                                                                                                                     |
|----|-----------------------------------------------------------------------------------|-----------------------------------------------------------------------------------------------------------------------------------------------------------------------------------------------------------------------------------------------------|
| 27 | Have you been done a vaginal exams                                                |                                                                                                                                                                                                                                                     |
| 28 | How many times have you been examined                                             |                                                                                                                                                                                                                                                     |
| 29 | Has labor started                                                                 |                                                                                                                                                                                                                                                     |
| 30 | How long has she been in labor                                                    |                                                                                                                                                                                                                                                     |
| 31 | Is the amniotic fluid meconium stained                                            |                                                                                                                                                                                                                                                     |
| 32 | Is there any history of chorioamnionitis in her pregnancy                         |                                                                                                                                                                                                                                                     |
| 33 | Has she been diagnosed to have cervical insufficiency in her previous pregnancies |                                                                                                                                                                                                                                                     |
|    | <b>MEDICAL HISTORY</b>                                                            |                                                                                                                                                                                                                                                     |
| 34 | Do you have any of the following conditions                                       | HIV    yes            no    I don't know<br>DM/GDM   Y    NO    I don't know<br>HTN            Y    NO    I don't know<br>UTI            Y    NO    I don't know<br>Abnormal vaginal discharge<br>Y    NO    I don't know<br>Others<br>specify..... |

|    |                                                                      |                                                                                     |
|----|----------------------------------------------------------------------|-------------------------------------------------------------------------------------|
| 35 | Have you used an epidural anaesthesia                                |                                                                                     |
|    | <b>EXAMINATION</b>                                                   |                                                                                     |
| 36 | Height.....<br>Weight .....<br>Temperature .....                     | BMI .....<br>BP .....<br>PULSE .....<br>FHR .....                                   |
| 37 | Is there abdominal tenderness?<br>Yes .....<br>No .....              | Is liquor foul smelling?<br>Yes .....<br>No .....                                   |
| 38 | <b>LABORATORY SECTION</b>                                            |                                                                                     |
| 39 | Was the culture positive<br>Yes .....<br>No .....                    | Culture results<br>1.Significan growth<br>2.No significant growth<br>3.Mixed growth |
| 40 | CBC                                                                  | Total white cell count.....                                                         |
| 41 | CRP<br>1. Normal value.....<br>2. Abnormal value.....                |                                                                                     |
| 42 | Microorganism identified<br>1 .....<br>2 .....<br>3 .....<br>4 ..... | Antibiotic sensitivity<br>.....<br>.....<br>.....<br>.....                          |

|  |  |  |
|--|--|--|
|  |  |  |
|--|--|--|

Thank you so much for your responses

Interviewer's observation to be filled in after completing the interview
